# Supplementary material for: Use of GeneXpert Remnants for Drug Resistance Profiling and Molecular Epidemiology of Tuberculosis in Libreville, Gabon
Source: PubMed Central journal article supplement (PMC5483912; doi:10.1128/jcm.02257-16), 2017-06-23

## **Suppl. Figure 1.**

### **Suppl. FIGURE 1.**

Amplification of hypervariable MIRU-VNTR loci (1982, 3232, 3820, 4102) from samples with Beijing and non-Beijing lineage spoligotypes  
Lanes 1 to 5, Gabon samples with Beijing lineage spoligotype SIT1; Lane 7, Gabon sample with Beijing lineage spoligotype SIT260; lanes 6, 8, 10, 11 and 12, Gabon strains with spoligotypes not belonging to the Beijing lineage; Lane 9 was left intentionally empty; lanes A and B, strains from Paris Bichat-Claude Bernard Hospital with spoligotypes belonging to the Beijing lineage; lanes C and D, strains from Paris Bichat-Claude Bernard Hospital with spoligotypes not of the Beijing lineage

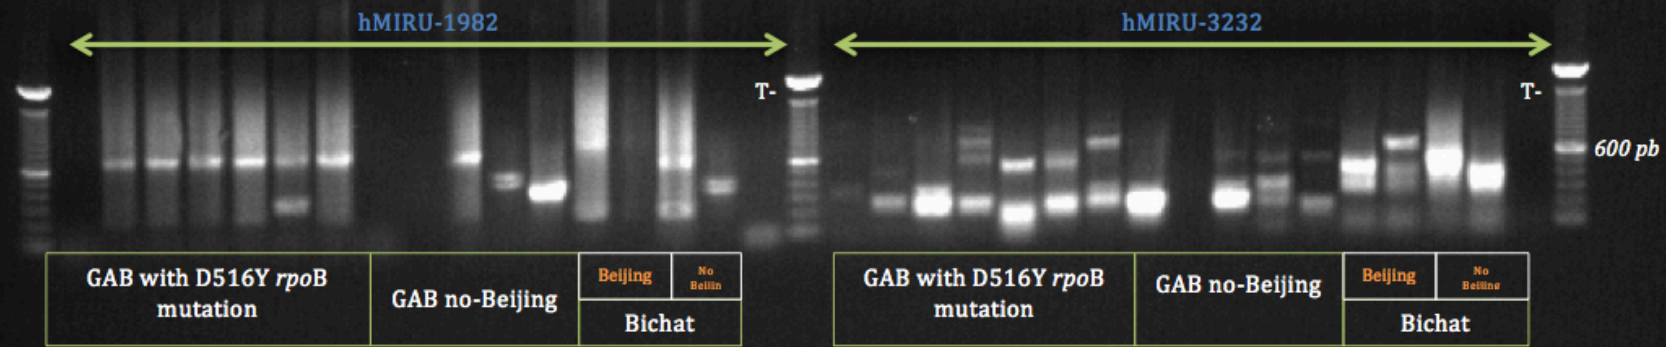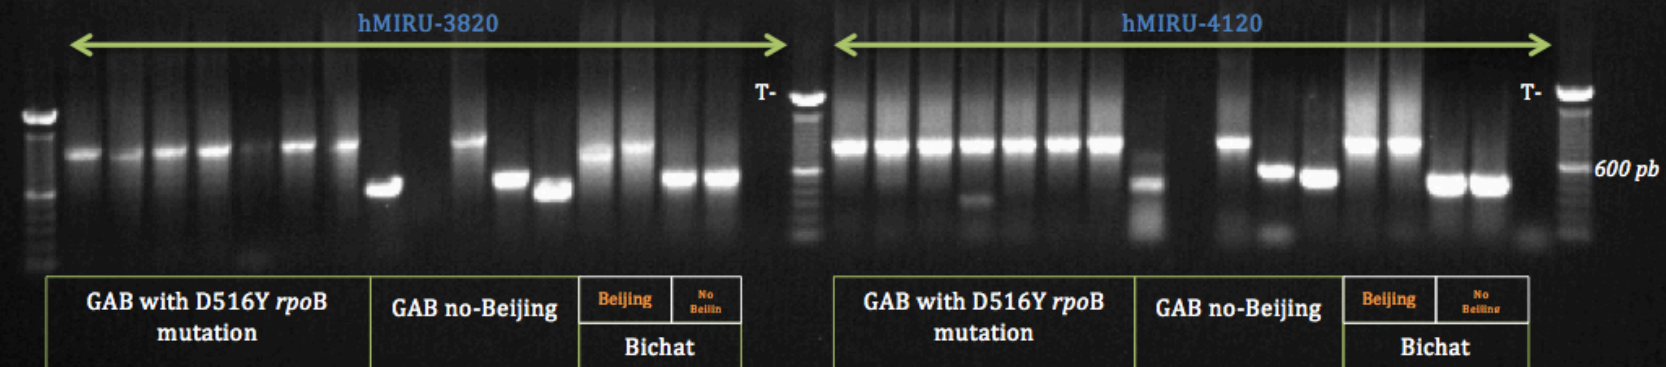

Supplement: JCM.02257-16_zjm999095550s1.pdf [file JCM.02257-16_zjm999095550s1.pdf]
